# Supplementary material for: Effect of the Preparation Conditions on the Catalytic Properties of CoPt for Highly Efficient 4-Nitrophenol Reduction
Source: MDPI journal article supplement (doi:10.3390/ma15186250), 2022-09-08
Supplement: s1 [file s1]

# Effect of the Preparation Conditions on the Catalytic Properties of CoPt for Highly Efficient 4-Nitrophenol Reduction

Oana-Georgiana Dragos-Pinzaru <sup>1</sup>, Gabriela Buema <sup>1,\*</sup>, Daniel Gherca <sup>1,\*</sup>, Ibro Tabakovic <sup>2</sup> and Nicoleta Lupu <sup>1</sup>

<sup>1</sup> National Institute of R&D for Technical Physics, 700050 Iasi, Romania

<sup>2</sup> ECE Department, University of Minnesota, Minneapolis, MN 55435, USA

\* Correspondence: gbuema@phys-iasi.ro (G.B.); dgherca@phys-iasi.ro (D.G.)

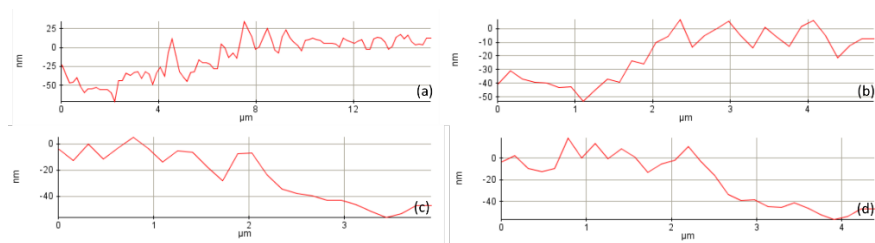

**Figure S1.** Lines profile of the electrodeposited CoPt alloy for various electrodeposition solutions: (a) pH=2.5 solutions without saccharine addition, (b) pH=2.5 solutions with saccharine addition, (c) pH=5.5 solutions without saccharine addition and (d) pH=5.5 solutions with saccharine addition

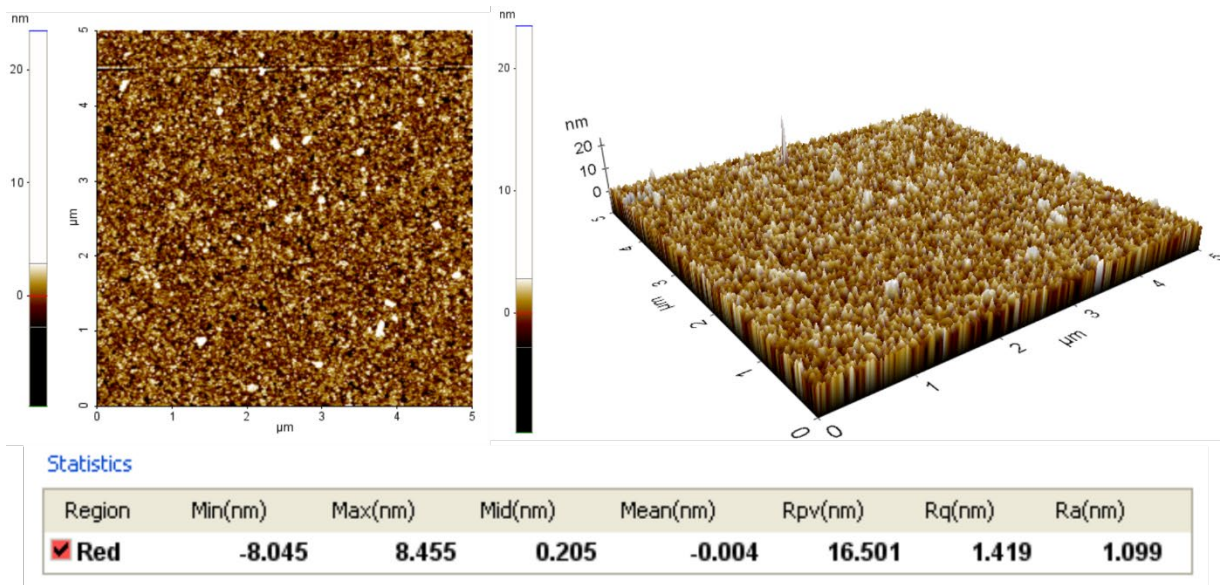

**Figure S2.** AFM images of the Au support together with the corresponding surface statistics

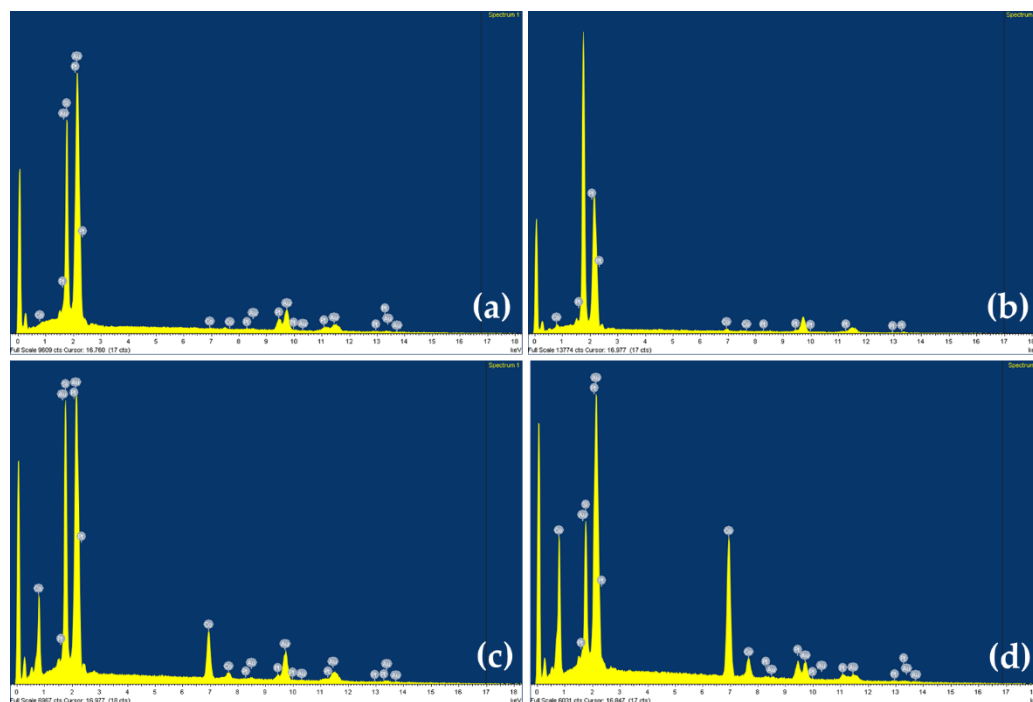

**Figure S3.** EDX spectra of the electrodeposited CoPt alloy for various electrodeposition solution: (a) pH=2.5 solutions without saccharine addition, (b) pH=2.5 solutions with saccharine addition, (c) pH=5.5 solutions without saccharine addition and (d) pH=5.5 solutions with saccharine addition

**Table S1:** EDX analysis of the electrodeposited CoPt thin film from electrochemical bath at pH = 2.5, in absence of saccharin

| No. crt. | ED bath pH | Addition of saccharin | Alloy composition |     |
|----------|------------|-----------------------|-------------------|-----|
|          |            |                       | % Pt              | %Co |
| 1        | 2.5        | NO                    | 90                | 10  |
| 2        |            |                       | 92                | 8   |
| 3        |            |                       | 90.5              | 9.5 |
| 4        |            |                       | 88                | 12  |

**Table S2:** EDX analysis of the electrodeposited CoPt thin film from electrochemical bath at pH = 2.5, in presence of saccharin

| No. crt. | ED bath pH | Addition of saccharin | Alloy composition |      |
|----------|------------|-----------------------|-------------------|------|
|          |            |                       | % Pt              | %Co  |
| 1        | 2.5        | YES                   | 88                | 12   |
| 2        |            |                       | 89                | 11   |
| 3        |            |                       | 88.5              | 11.5 |
| 4        |            |                       | 90                | 10   |

**Table S3:** EDX analysis of the electrodeposited CoPt thin film from electrochemical bath at pH = 5.5, in absence of saccharin

| No. crt. | ED bath pH | Addition of saccharin | Alloy composition |      |
|----------|------------|-----------------------|-------------------|------|
|          |            |                       | % Pt              | %Co  |
| 1        | 5.5        | NO                    | 78                | 22   |
| 2        |            |                       | 78.5              | 21.5 |
| 3        |            |                       | 80                | 20   |
| 4        |            |                       | 77                | 23   |

**Table S4:** EDX analysis of the electrodeposited CoPt thin film from electrochemical bath at pH = 5.5, in presence of saccharin

| No. crt. | ED bath pH | Addition of saccharin | Alloy composition |      |
|----------|------------|-----------------------|-------------------|------|
|          |            |                       | % Pt              | %Co  |
| 1        | 5.5        | YES                   | 15                | 85   |
| 2        |            |                       | 16                | 84   |
| 3        |            |                       | 15.5              | 84.5 |
| 4        |            |                       | 14.5              | 85.5 |
